# Supplementary material
Source: PubMed Central journal article supplement (PMC10440656)
Supplement: Suppl_TableS1.pdf [file Suppl_TableS1.pdf]

**Table 1: PCR Primers**

| <b>Primers for gene expression</b>                                                   | <b>sequence 5'-3'</b>     |
|--------------------------------------------------------------------------------------|---------------------------|
| RCAN1-4 Forward                                                                      | CTTCAGCGAAAGTGAAACCA      |
| RCAN1-4 Reverse                                                                      | GGAGAAGGGGTTGCTGAAGT      |
| GAPDH Forward                                                                        | CACCAACTGCTTAGCACCCC      |
| GAPDH Reverse                                                                        | TCTTCTGGGTGGCAGTGATG      |
| NFE2L3 TaqMan assay                                                                  | Cat# Hs00852569_g1        |
| GAPDH TaqMan assay                                                                   | Cat# 4352934E             |
|                                                                                      |                           |
| <b>Primers for qPCR at promoter ( region1; Bead Assay)</b>                           | <b>sequence 5'-3'</b>     |
| RCAN1.4 region1 Forward                                                              | AAGAAGGGTCGTCCCATT        |
| RCAN1.4 region1 Reverse                                                              | GGTTTGCTTCACAGCTGCTT      |
|                                                                                      |                           |
| <b>Primers for qPCR at intron1 (Bead Assay)</b>                                      | <b>sequence 5'-3'</b>     |
| RCAN1.4 region2 Forward                                                              | TCTACCGTCCGCCAGCTC        |
| RCAN1.4 region2 Reverse                                                              | CCGGCTTTTCTTCAGTTTAGG     |
| RCAN1.4 region3 Forward                                                              | AACGACCTGCCTGGCAGGGA      |
| RCAN1.4 region3 Reverse                                                              | CTATGGAAGGCGCAGTGCT       |
|                                                                                      |                           |
| <b>Primers for Methylation Specific PCR at intron 1<br/>(Ref 32 main manuscript)</b> | <b>sequence 5'-3'</b>     |
| Methylated DNA(M) Forward                                                            | GTTAGTTTCGCGTTTTTTTCGTAC  |
| Methylated DNA(M) Reverse                                                            | GATCCCTACCAAACAAATCGTT    |
| Unmethylated DNA(U) Forward                                                          | GTTAGTTTGTGTTTTTTTGTATGT  |
| Unmethylated DNA(U) Reverse                                                          | AATCCCTACCAAACAAATCATT    |
|                                                                                      |                           |
| <b>Primers for PCR sequencing of <i>BRAF</i> and TERT promoter</b>                   | <b>sequence 5'-3'</b>     |
| BRAF Forward                                                                         | GGAAAGCATCTCACCTCATCC     |
| BRAF Reverse                                                                         | GAACACTGATTTTTGTGAATACTGG |
| TERT Forward                                                                         | GGCCGATTCGACCTCTCT        |
| TERT Reverse                                                                         | AGCACCTCGCGGTAGTGG        |
