# Supplementary material
Source: PubMed Central journal article supplement (PMC10440656)
Supplement: Suppl_TableS2.pdf [file Suppl_TableS2.pdf]

**Table 2: Clinical information on 18 papillary thyroid cancer cases**

|    | subtype           | at Diagn | Sex    | T stage | N stage | M stage | tumor size (cm) | extrathyroidal extension | vascular invasion | RAF V600E | ERT C228 | ERT C250 | Latest Disease Status   |
|----|-------------------|----------|--------|---------|---------|---------|-----------------|--------------------------|-------------------|-----------|----------|----------|-------------------------|
| 1  | classic type      | 66       | Male   | T3      | N1b     | M0      | 2.2x1.8x1.5     | Yes                      | Yes               | Yes       | Yes      | No       | Persistent/paratracheal |
| 2  | classic type      | 19       | Female | T1      | N1a     | M0      | 2.3x1.4x0.6     | No                       | No                | Yes       | No       | No       | NED                     |
| 3  | classic type      | 48       | Male   | T1b     | N0      | M0      | 1.8             | No                       | No                | Yes       | No       | No       | NED                     |
| 4  | microcarcinoma    | 46       | Female | T1a     | N0      | M0      | 0.8             | No                       | No                | N/A*      | N/A*     | N/A*     | unknown                 |
| 5  | tall cell variant | 71       | Male   | T2      | N1b     | M0      | 2.3x1.9x1.4     | Yes                      | Yes (LVI)**       | Yes       | Yes      | No       | unknown                 |
| 6  | classic type      | 27       | Female | T3      | N1b     | M0      | 2               | Yes                      | No                | Yes       | No       | No       | persistent/central neck |
| 7  | classic type      | 26       | Female | T2      | N1b     | M0      | 2.6x1.8x1.4     | Yes                      | Yes (LVI)         | Yes       | No       | No       | unknown                 |
| 8  | classic type      | 60       | Female | T1b     | N0      | M0      | 2.0x1.5x1.5     | Yes                      | Yes               | Yes       | No       | No       | Died of other causes    |
| 9  | classic type      | 22       | Male   | T2      | Nx      | M0      | 3.8x3.4x3.1     | No                       | No                | Yes       | No       | No       | NED                     |
| 10 | classic type      | 53       | Male   | T2      | N1a     | M0      | 2.2x1.9x1.4     | No                       | No                | Yes       | N/A*     | N/A*     | NED                     |
| 11 | classic type      | 63       | Male   | T1b     | N1b     | M0      | 1.3x1.1x1.0     | No                       | No (LVI)**        | Yes       | No       | No       | unknown                 |
| 12 | classic type      | 68       | Female | T1b     | N0      | M0      | 1.2             | No                       | No (LVI)**        | Yes       | No       | No       | NED                     |
| 13 | classic type      | 30       | Male   | T3a     | N1b     | M0      | 4.5x2.9x1.9     | Yes                      | Yes(LVI)**        | Yes       | N/A*     | N/A*     | NED                     |
| 14 | classic type      | 41       | Male   | T3a     | N1b     | M0      | 5.5x5.0x4.0     | No                       | No                | Yes       | No       | No       | NED                     |
| 15 | classic type      | 68       | Female | T1b     | Nx      | M0      | 1.5x1.5x1.0     | No                       | No                | Yes       | No       | No       | NED                     |
| 16 | classic type      | 39       | Female | T1b     | N0      | M0      | 1.7             | No                       | No                | Yes       | No       | No       | NED                     |
| 17 | Anaplastic type   | 69       | Male   | T4a     | N1b     | M0      | >11cm           | Yes                      | Yes               | Yes       | Yes      | No       | unknown                 |
| 18 | usual variant     | 45       | Male   | T2      | N1a     | M0      | 3.6x2.2x1.7     | No                       | No                | Yes       | No       | No       | NED                     |

\*N/A: DNA not available

\*\* LVI: lymphovascular invasion

NED= No evidence if disease
